# Supplementary material
Source: MDPI journal article supplement (https://www.mdpi.com/2075-163X/13/8/1055)
Supplement: s1 [file s1]

# Physicochemical Properties of Fe-Bearing Phases from Commercial Colombian Coal Ash

Ana Cláudia Santos <sup>1,\*</sup>, Cláudia Cruz <sup>1</sup>, Eric Font <sup>2,3</sup>, David French <sup>4</sup>, Alexandra Guedes <sup>1</sup>, Karen Moreira <sup>1</sup>, Helena Sant'Ovaia <sup>1</sup>, Bruno J. C. Vieira <sup>5</sup>, João C. Waerenborgh <sup>5</sup> and Bruno Valentim <sup>1</sup>

<sup>1</sup> Earth Science Institute—Porto Pole, Department of Geosciences, Environment and Spatial Plannings, Faculty of Sciences, University of Porto, Rua do Campo Alegre s/n, 4169-007 Porto, Portugal; claudiacruz@fc.up.pt (C.C.); aguedes@fc.up.pt (A.G.); karendasilvamoreira@gmail.com (K.M.); hsantov@fc.up.pt (H.S.); bvvalent@fc.up.pt (B.V.)

<sup>2</sup> Department of Earth Sciences, University of Coimbra, 3030-790 Coimbra, Portugal; font\_eric@hotmail.com

<sup>3</sup> Instituto Dom Luís (IDL), Faculdade de Ciências, Universidade de Lisboa, 1749-026 Lisboa, Portugal

<sup>4</sup> School of Biological, Earth and Environmental Sciences, University of New South Wales, Sydney, NSW 2052, Australia; davidfrench474@gmail.com

<sup>5</sup> Centro de Ciências e Tecnologias Nucleares, DECN, Instituto Superior Técnico, Universidade de Lisboa, 2695-066 Bobadela LRS, Portugal; brunovieira@ctn.tecnico.ulisboa.pt (B.J.C.V.); jcarlos@ctn.tecnico.ulisboa.pt (J.C.W.)

\* Correspondence: anasantos@fc.up.pt

Table S1 – Trace elements results for magnetic concentrates and respective size-fractions. World coal ash (WCA; Ketris and Yudovich, 2009) added for comparison.

|        |      | PPB              |      |      |      |      |      |      |       |       |       | PPM   |       |     |      |      |      |      |      |      |      |       |       |
|--------|------|------------------|------|------|------|------|------|------|-------|-------|-------|-------|-------|-----|------|------|------|------|------|------|------|-------|-------|
|        |      | C <sub>tot</sub> | Ag   | Al   | Ca   | Fe   | K    | Mg   | Na    | P     | S     | Ti    | As    | Ba  | Be   | Bi   | Cd   | Co   | Cr   | Cu   | Hf   | In    |       |
| WCA    |      | n.a.             | 0.6  | n.a. | n.a. | n.a. | n.a. | n.a. | n.a.  | n.a.  | n.a.  | 51    | 1040  | 13  | 7.9  | 1.5  | 39   | 125  | 115  | 9.3  | 0.39 |       |       |
| SI-BA  | Bulk | 0.35             | 0.1  | 7.42 | 0.79 | 5.14 | 1.6  | 0.96 | 0.76  | 0.054 | <0.04 | 0.478 | 2.1   | 764 | 4    | 0.13 | 0.27 | 17.7 | 91   | 56.6 | 3.87 | 0.03  |       |
|        | Fe   | MC               | 0.07 | 0.1  | 8.52 | 1.26 | 9.05 | 1.49 | 1.45  | 0.634 | 0.059 | <0.1  | 0.414 | 3   | 750  | 3    | 0.1  | 0.3  | 19.9 | 97   | 53.2 | 3.4   | <0.05 |
|        |      | >500             | 0.04 | 0.1  | 8.65 | 0.98 | 5.43 | 1.87 | 1.16  | 0.71  | 0.067 | <0.1  | 0.497 | 3   | 986  | 4    | <0.1 | 0.5  | 20.2 | 86   | 54.7 | 4.1   | <0.05 |
|        |      | 500-150          | 0.08 | 0.1  | 9.11 | 1.25 | 6.32 | 1.78 | 1.28  | 0.692 | 0.074 | <0.1  | 0.492 | 4   | 916  | 4    | 0.1  | 0.5  | 20.4 | 87   | 59.6 | 4     | 0.06  |
|        |      | 150-75           | 0.08 | 0.1  | 8.49 | 1.2  | 8.21 | 1.68 | 1.46  | 0.644 | 0.074 | <0.1  | 0.474 | 5   | 822  | 4    | <0.1 | 0.6  | 20.5 | 91   | 56.3 | 3.6   | <0.05 |
|        |      | 75-45            | 0.1  | 0.1  | 8.55 | 1.17 | 10.2 | 1.52 | 1.58  | 0.634 | 0.065 | <0.1  | 0.441 | 5   | 807  | 3    | <0.1 | 0.6  | 22.9 | 100  | 56.9 | 3.5   | <0.05 |
|        |      | <45              | 0.24 | 0.2  | 9.13 | 1.13 | 13.5 | 1.56 | 1.74  | 0.632 | 0.072 | <0.1  | 0.463 | 7   | 844  | 4    | 0.1  | 0.7  | 30.6 | 169  | 66.8 | 3.7   | 0.06  |
|        |      | TL               | 0.24 | 0.1  | 8.43 | 0.82 | 4.45 | 1.62 | 0.96  | 0.719 | 0.053 | <0.1  | 0.449 | 1   | 767  | 3    | <0.1 | 0.2  | 16.7 | 77   | 47.4 | 3.9   | <0.05 |
|        | Nd   | MC               | 0.21 | 0.1  | 8.98 | 0.9  | 4.58 | 1.88 | 1.06  | 0.759 | 0.066 | <0.1  | 0.497 | 3   | 914  | 3    | 0.1  | 0.5  | 19.3 | 85   | 63.3 | 4     | 0.05  |
|        |      | >2000            | 0.05 | 0.1  | 9.07 | 0.93 | 4.94 | 1.93 | 1.09  | 0.686 | 0.06  | <0.1  | 0.508 | 3   | 965  | 4    | <0.1 | 0.4  | 21.1 | 104  | 67.6 | 4.3   | 0.05  |
|        |      | 2000-500         | 0.05 | 0.2  | 9.36 | 0.96 | 4.96 | 1.9  | 1.12  | 0.681 | 0.069 | <0.1  | 0.509 | 2   | 988  | 3    | 0.1  | 0.8  | 22.4 | 93   | 61.7 | 4.3   | 0.06  |
|        |      | 500-150          | 0.28 | 0.1  | 8.78 | 1.05 | 4.87 | 1.77 | 1.11  | 0.737 | 0.069 | <0.1  | 0.492 | 4   | 911  | 4    | <0.1 | 0.6  | 24.5 | 85   | 54.7 | 3.9   | 0.06  |
|        |      | 150-75           | 0.23 | 0.1  | 7.9  | 0.87 | 3.9  | 1.74 | 0.95  | 0.698 | 0.063 | <0.1  | 0.459 | 4   | 831  | 3    | <0.1 | 0.4  | 18.1 | 71   | 50.1 | 3.7   | <0.05 |
|        |      | 75-45            | 0.27 | 0.1  | 8.9  | 0.74 | 3.63 | 1.93 | 0.91  | 0.79  | 0.068 | <0.1  | 0.481 | 4   | 894  | 3    | 0.3  | 0.6  | 18.6 | 71   | 51.3 | 3.8   | 0.05  |
|        |      | <45              | 0.51 | 0.1  | 9.18 | 0.6  | 3.8  | 2.02 | 0.94  | 0.844 | 0.063 | <0.1  | 0.534 | 4   | 958  | 4    | 0.2  | 0.9  | 22.6 | 90   | 57.8 | 4.3   | 0.05  |
|        | TL   | 0.22             | <0.1 | 8.22 | 0.84 | 4.98 | 1.64 | 1.02 | 0.751 | 0.062 | 0.1   | 0.479 | 12    | 803 | 4    | <0.1 | <0.1 | 17.4 | 108  | 44.8 | 4    | <0.05 |       |
| SI-ECO | Bulk | 1.69             | 0.1  | 6.67 | 1.12 | 5.42 | 1.33 | 1.01 | 0.839 | 0.054 | 0.05  | 0.376 | 6.5   | 696 | 3    | 0.16 | 0.7  | 15.2 | 76   | 48.1 | 3.05 | 0.04  |       |
|        | Fe   | MC               | 0.41 | <0.1 | 6.43 | 2.09 | 23.8 | 0.96 | 2.48  | 0.443 | 0.066 | <0.1  | 0.312 | 10  | 634  | 3    | 0.1  | 0.5  | 23   | 120  | 53   | 2.6   | <0.05 |
|        |      | >150             | 2.52 | 0.2  | 8.84 | 1.45 | 7.04 | 1.73 | 1.43  | 0.777 | 0.085 | <0.1  | 0.475 | 14  | 902  | 4    | 0.2  | 1.4  | 20.4 | 117  | 58.2 | 3.7   | 0.08  |
|        |      | 150-75           | 1.15 | 0.1  | 7.28 | 2.25 | 17.6 | 1.15 | 2.26  | 0.583 | 0.08  | <0.1  | 0.362 | 9   | 782  | 4    | <0.1 | 0.9  | 20.2 | 103  | 49.5 | 3.1   | <0.05 |
|        |      | 75-45            | 0.27 | 0.1  | 6.75 | 1.99 | 22.3 | 0.95 | 2.45  | 0.408 | 0.066 | <0.1  | 0.35  | 8   | 700  | 3    | <0.1 | 0.6  | 25.8 | 105  | 54.1 | 2.9   | <0.05 |
|        |      | <45              | 0.23 | 0.2  | 7.78 | 1.9  | 23.4 | 1.06 | 2.54  | 0.398 | 0.091 | <0.1  | 0.395 | 16  | 814  | 4    | 0.2  | 1.2  | 34.5 | 174  | 74.6 | 3.5   | 0.07  |
|        |      | TL               | 1.76 | 0.1  | 7.12 | 0.92 | 2.67 | 1.42 | 0.82  | 0.781 | 0.052 | <0.1  | 0.403 | 5   | 688  | 3    | 0.1  | 0.7  | 13.2 | 66   | 40   | 3     | <0.05 |
|        | Nd   | MC               | 0.53 | 0.2  | 8.44 | 1.17 | 3.86 | 1.7  | 1.1   | 0.744 | 0.063 | <0.1  | 0.465 | 8   | 961  | 3    | 0.2  | 1.3  | 20   | 74   | 54.8 | 4.1   | <0.05 |
|        |      | >150             | 0.68 | 0.2  | 9.2  | 1.05 | 4.62 | 1.8  | 1.15  | 0.767 | 0.069 | <0.1  | 0.52  | 9   | 961  | 4    | 0.3  | 1.4  | 22.6 | 101  | 63.6 | 4.3   | 0.06  |
|        |      | 150-75           | 0.46 | 0.1  | 6.52 | 1.28 | 3.22 | 1.3  | 0.96  | 0.824 | 0.06  | <0.1  | 0.337 | 6   | 709  | 3    | <0.1 | 0.7  | 13.7 | 55   | 39.5 | 2.7   | 0.05  |
|        |      | 75-45            | 0.25 | 0.1  | 8.83 | 1.28 | 3.58 | 1.65 | 1.06  | 0.885 | 0.069 | <0.1  | 0.445 | 6   | 844  | 3    | 0.2  | 0.7  | 16   | 59   | 48.4 | 3.5   | <0.05 |
|        |      | <45              | 0.35 | 0.3  | 9.81 | 1.09 | 4.18 | 1.92 | 1.21  | 0.951 | 0.075 | <0.1  | 0.57  | 10  | 1101 | 4    | 0.3  | 1.5  | 22.8 | 94   | 65   | 5     | 0.07  |
| TL     |      | 3.49             | <0.1 | 6.68 | 0.84 | 1.45 | 1.22 | 0.59 | 0.94  | 0.049 | <0.1  | 0.314 | 3     | 614 | 2    | 0.2  | 0.6  | 9.6  | 44   | 31.5 | 2.8  | <0.05 |       |

BA - bottom ash; ECO, economizer grits; ESP, electrostatic precipitator; MC, magnetic concentrate; TL, tailings;

Table S1 – Continuation.

| PPM  |      |     |       |       |       |        |       |      |      |     |     |     |       |      |      |     |     |     |      |       |      |
|------|------|-----|-------|-------|-------|--------|-------|------|------|-----|-----|-----|-------|------|------|-----|-----|-----|------|-------|------|
| Li   | Mn   | Mo  | Nb    | Ni    | Pb    | Re     | Rb    | Sb   | Se   | Sn  | Sr  | Ta  | Te    | Th   | Tl   | U   | V   | W   | Zn   | Zr    | Sc   |
| 87   | 460  | 15  | 23    | 105   | 61    | n.a.   | 120   | 8.1  | 10.7 | 8.4 | 780 | 2.1 | n.a.  | 24   | 5    | 16  | 180 | 8.4 | 180  | 240   | 25   |
| 80.7 | 593  | 4.6 | 12.03 | 60.7  | 11.17 | <0.002 | 36    | 2.67 | 0.6  | 1.1 | 200 | 0.8 | <0.05 | 5.6  | 0.48 | 3.9 | 217 | 1   | 89.8 | 142.6 | 14.2 |
| 70.3 | 1082 | 4.3 | 10.6  | 66.6  | 10.8  | <0.005 | 73    | 3.2  | <1   | 1.4 | 225 | 0.7 | <0.5  | 9.3  | <0.5 | 4.1 | 231 | 1.3 | 95   | 125.9 | 21   |
| 75.1 | 589  | 3.7 | 13.3  | 62.9  | 15.3  | <0.005 | 101.1 | 4.1  | <1   | 1.5 | 271 | 1   | <0.5  | 12.1 | 0.6  | 4.9 | 231 | 4.2 | 114  | 148.1 | 19   |
| 72.7 | 749  | 4   | 12.5  | 65.2  | 14    | <0.005 | 100.1 | 3.8  | <1   | 1.4 | 272 | 0.9 | <0.5  | 12.5 | <0.5 | 4.9 | 225 | 4.2 | 109  | 144.2 | 20   |
| 68.1 | 1046 | 4.1 | 11.2  | 63.6  | 12.4  | <0.005 | 80.1  | 3.5  | <1   | 1.4 | 243 | 0.8 | <0.5  | 10.4 | <0.5 | 4.2 | 238 | 3   | 100  | 131.3 | 21   |
| 72   | 1173 | 4.6 | 10.9  | 68.2  | 12.5  | <0.005 | 70.5  | 3.4  | <1   | 1.5 | 231 | 0.8 | <0.5  | 10.3 | 0.5  | 4.5 | 250 | 2.4 | 99   | 130   | 22   |
| 70.4 | 1319 | 6.7 | 11.4  | 96.2  | 14.5  | <0.005 | 81.4  | 4.9  | <1   | 2.2 | 241 | 0.7 | <0.5  | 11   | 0.6  | 5.3 | 297 | 4.3 | 143  | 130.2 | 25   |
| 75.2 | 470  | 2.3 | 11.7  | 55    | 9.7   | <0.005 | 84.4  | 2.4  | <1   | 0.9 | 214 | 0.8 | <0.5  | 9.5  | <0.5 | 3.9 | 202 | 1   | 74   | 146   | 17   |
| 73.5 | 491  | 3.1 | 12.9  | 61.5  | 14.5  | <0.005 | 97.6  | 3.6  | <1   | 1.4 | 262 | 0.9 | <0.5  | 11.8 | 0.6  | 4.6 | 224 | 2.5 | 110  | 148.3 | 19   |
| 75.2 | 535  | 2.9 | 13.3  | 77.8  | 14.7  | <0.005 | 102.4 | 3.6  | <1   | 1.3 | 274 | 0.9 | <0.5  | 11.8 | 0.5  | 4.9 | 225 | 1.9 | 112  | 154   | 20   |
| 76.2 | 534  | 3.7 | 14    | 70.4  | 16.7  | <0.005 | 104.6 | 4.5  | <1   | 2.1 | 285 | 1   | <0.5  | 12   | 0.7  | 5   | 236 | 2.4 | 132  | 160.8 | 20   |
| 80   | 540  | 3.4 | 12.9  | 66.1  | 13.3  | <0.005 | 95.5  | 3.5  | <1   | 1.3 | 262 | 0.9 | <0.5  | 10.7 | 0.5  | 1.1 | 222 | 2.7 | 104  | 143.1 | 19   |
| 70.2 | 427  | 2.9 | 11.6  | 54.8  | 12.1  | <0.005 | 89.2  | 3    | <1   | 1.2 | 230 | 0.8 | <0.5  | 10.6 | 0.5  | 4   | 199 | 3   | 88   | 131.2 | 17   |
| 79   | 383  | 3.1 | 12.9  | 56.4  | 14    | <0.005 | 95.4  | 3.4  | <1   | 1.2 | 238 | 0.9 | <0.5  | 11.2 | 0.6  | 3.9 | 203 | 3.1 | 92   | 149.6 | 18   |
| 87   | 367  | 3   | 13.9  | 67.5  | 16.8  | <0.005 | 105   | 3.9  | <1   | 1.5 | 248 | 1   | <0.5  | 12   | 0.7  | 4   | 219 | 4.6 | 116  | 165.7 | 20   |
| 72.5 | 512  | 3   | 11.5  | 63.2  | 8.2   | <0.005 | 85.9  | 2.2  | <1   | 0.8 | 216 | 0.8 | <0.5  | 10.3 | <0.5 | 4   | 197 | 1.8 | 67   | 151.9 | 18   |
| 64.2 | 626  | 5.4 | 8.79  | 50.1  | 11.52 | 0.008  | 31.9  | 3.42 | 0.9  | 1.3 | 194 | 0.6 | 0.07  | 5.5  | 0.56 | 3.3 | 184 | 1   | 82.9 | 108   | 12.6 |
| 43.8 | 2592 | 8.5 | 7.9   | 79.4  | 7.9   | <0.005 | 51.3  | 4.5  | <1   | 1.3 | 209 | 0.5 | <0.5  | 7.9  | <0.5 | 4.2 | 242 | 1.5 | 85   | 98.8  | 26   |
| 74.5 | 939  | 6.9 | 11.5  | 67    | 15.3  | <0.005 | 82.9  | 6.3  | <1   | 1.8 | 261 | 0.8 | <0.5  | 10.8 | 0.6  | 4.8 | 252 | 1.7 | 120  | 132.4 | 22   |
| 56.1 | 2385 | 7.6 | 8.8   | 66    | 9.7   | <0.005 | 66.8  | 4.1  | <1   | 1.2 | 231 | 0.6 | <0.5  | 10.2 | <0.5 | 4.2 | 222 | 1.5 | 85   | 104   | 25   |
| 41.7 | 2546 | 7.6 | 8.3   | 79.5  | 9.1   | <0.005 | 59.4  | 4.6  | <1   | 1.4 | 220 | 0.6 | <0.5  | 9.8  | <0.5 | 4.6 | 244 | 1.4 | 88   | 104.5 | 27   |
| 49.1 | 2187 | 11  | 10.5  | 112.2 | 13.3  | <0.005 | 72.6  | 7.8  | <1   | 2.5 | 267 | 0.7 | <0.5  | 11.8 | 0.6  | 7   | 346 | 2.7 | 146  | 122.9 | 29   |
| 62.1 | 304  | 3.3 | 9.3   | 44.3  | 10.3  | <0.005 | 73.4  | 3    | <1   | 1   | 196 | 0.6 | <0.5  | 8    | 0.6  | 3.2 | 156 | 0.9 | 73   | 114.8 | 14   |
| 69.8 | 451  | 4.5 | 12.6  | 62    | 16    | <0.005 | 101.9 | 5.1  | <1   | 1.6 | 276 | 0.9 | <0.5  | 12.6 | 0.7  | 5   | 204 | 1.7 | 116  | 147.2 | 17   |
| 76   | 508  | 5.3 | 13.2  | 70.2  | 18.5  | <0.005 | 96.7  | 6.1  | <1   | 2   | 282 | 0.9 | <0.5  | 11.7 | 0.8  | 5.5 | 250 | 1.8 | 132  | 151.8 | 20   |
| 55.8 | 404  | 3.2 | 8.1   | 40.9  | 9.9   | <0.005 | 69.9  | 2.9  | <1   | 0.9 | 197 | 0.6 | <0.5  | 8.9  | <0.5 | 3.3 | 146 | 1.2 | 74   | 97.5  | 14   |
| 76.5 | 438  | 3.5 | 11.1  | 52.7  | 11.9  | <0.005 | 80.8  | 3.7  | <1   | 1.1 | 240 | 0.8 | <0.5  | 11.3 | 0.5  | 4.2 | 196 | 1.1 | 80   | 137.5 | 18   |
| 98.5 | 478  | 5.3 | 14.2  | 70.8  | 19.4  | <0.005 | 104.6 | 6    | <1   | 1.8 | 322 | 1   | <0.5  | 14.4 | 0.8  | 5.8 | 260 | 1.8 | 116  | 176.1 | 23   |
| 61.2 | 167  | 2   | 7.7   | 29.2  | 7.9   | 0.007  | 62.3  | 2    | <1   | 0.6 | 176 | 0.5 | <0.5  | 7.2  | <0.5 | 2.6 | 114 | 0.7 | 52   | 94.4  | 11   |

Table S1 -Continuation.

|          |      | PPB              |       |      |      |      |      |      |       |       |       |       | PPM   |      |      |      |      |      |      |      |      |      |       |
|----------|------|------------------|-------|------|------|------|------|------|-------|-------|-------|-------|-------|------|------|------|------|------|------|------|------|------|-------|
|          |      | C <sub>tot</sub> | Ag    | Al   | Ca   | Fe   | K    | Mg   | Na    | P     | S     | Ti    | As    | Ba   | Be   | Bi   | Cd   | Co   | Cr   | Cu   | Hf   | In   |       |
| S1-ESP12 | Bulk | 5.51             | 0.3   | 7.5  | 0.65 | 4.37 | 1.81 | 0.9  | 0.794 | 0.066 | 0.11  | 0.507 | 18    | 813  | 4    | 0.39 | 1.91 | 20.3 | 107  | 68.9 | 3.8  | 0.08 |       |
|          | Fe   | MC               | 1.72  | 0.1  | 6.5  | 1.68 | 26.8 | 0.88 | 2.3   | 0.329 | 0.085 | <0.1  | 0.293 | 24   | 565  | 4    | 0.2  | 1    | 40.2 | 242  | 59.1 | 2.4  | 0.07  |
|          |      | > 75             | 9.95  | 0.1  | 7.49 | 1.88 | 14.3 | 1.32 | 1.76  | 0.566 | 0.068 | 0.2   | 0.344 | 13   | 682  | 4    | 0.2  | 0.9  | 17.4 | 100  | 46.2 | 2.8  | 0.07  |
|          |      | 75-45            | 3.58  | 0.1  | 7.72 | 1.99 | 25.4 | 1.09 | 2.43  | 0.498 | 0.07  | <0.1  | 0.351 | 14   | 652  | 3    | 0.2  | 0.8  | 32.6 | 126  | 53.7 | 2.6  | 0.09  |
|          |      | 45-25            | 1.32  | 0.1  | 6.93 | 1.72 | 26.3 | 0.88 | 2.3   | 0.408 | 0.076 | <0.1  | 0.332 | 21   | 645  | 3    | 0.2  | 1.2  | 40   | 186  | 59.7 | 2.8  | 0.11  |
|          |      | <25              | 0.66  | 0.3  | 8.37 | 1.69 | 27.7 | 1.18 | 2.57  | 0.443 | 0.132 | <0.1  | 0.4   | 53   | 827  | 6    | 0.6  | 2.5  | 47.9 | 374  | 83.1 | 3    | 0.15  |
|          |      | TL               | 5.69  | 0.3  | 8.61 | 0.58 | 3.15 | 1.96 | 0.92  | 0.784 | 0.065 | <0.1  | 0.521 | 17   | 944  | 4    | 0.4  | 1.9  | 20.9 | 114  | 69   | 4.3  | 0.07  |
|          | Nd   | MC               | 7.54  | 0.2  | 9.18 | 0.95 | 5.25 | 1.76 | 1.31  | 0.646 | 0.084 | <0.1  | 0.497 | 24   | 899  | 4    | 0.4  | 2.1  | 24.7 | 155  | 67.5 | 3.7  | 0.08  |
|          |      | >75              | 16.79 | 0.2  | 7.82 | 0.87 | 4.5  | 1.64 | 1.04  | 0.717 | 0.068 | <0.1  | 0.438 | 18   | 840  | 4    | 0.7  | 2.3  | 17.3 | 115  | 62.1 | 3.4  | 0.09  |
|          |      | 75-45            | 10.32 | 0.2  | 9.16 | 0.97 | 4.45 | 1.84 | 1.1   | 0.813 | 0.07  | <0.1  | 0.474 | 20   | 957  | 4    | 0.3  | 2.1  | 20.5 | 122  | 66.3 | 3.6  | <0.05 |
|          |      | 45-25            | 5.9   | 0.2  | 9.53 | 1.1  | 4.84 | 1.77 | 1.23  | 0.693 | 0.077 | <0.1  | 0.494 | 24   | 881  | 4    | 0.3  | 1.8  | 23   | 144  | 66   | 3.8  | <0.05 |
|          |      | <25              | 1.81  | 0.3  | 10.7 | 0.95 | 6.63 | 2.08 | 1.59  | 0.749 | 0.099 | <0.1  | 0.596 | 32   | 1061 | 5    | 0.5  | 2.7  | 30.6 | 185  | 78.9 | 4.4  | 0.12  |
|          |      | TL               | 6.13  | 0.3  | 9.12 | 0.6  | 2.64 | 2.04 | 0.89  | 0.682 | 0.068 | <0.1  | 0.529 | 18   | 1025 | 4    | 0.6  | 2.4  | 21.3 | 97   | 68.2 | 4.5  | 0.08  |
| S4-BA    | Bulk | 0.22             | 0.1   | 7.43 | 0.83 | 5.99 | 1.44 | 0.87 | 0.692 | 0.043 | <0.04 | 0.476 | 3.8   | 894  | 4    | 0.09 | 0.33 | 20.3 | 88   | 73.5 | 4.5  | 0.04 |       |
|          | Fe   | MC               | 0.05  | 0.1  | 8.31 | 1.33 | 10.4 | 1.37 | 1.3   | 0.595 | 0.048 | <0.1  | 0.408 | 5    | 811  | 4    | 0.1  | 0.4  | 24   | 98   | 49.3 | 3.4  | <0.05 |
|          |      | TL               | 0.13  | 0.1  | 8.44 | 0.93 | 5.5  | 1.52 | 0.92  | 0.683 | 0.042 | <0.1  | 0.466 | 4    | 907  | 4    | <0.1 | 0.2  | 20.3 | 73   | 45.2 | 4.3  | <0.05 |
| S4-ECO   | Bulk | 5.32             | 0.1   | 8.77 | 1.31 | 6.32 | 1.42 | 0.97 | 0.684 | 0.049 | 0.07  | 0.422 | 11    | 854  | 4    | 0.11 | 0.76 | 18.3 | 85   | 47.2 | 3.75 | 0.04 |       |
|          | Fe   | MC               | 2.73  | 0.1  | 7.35 | 1.73 | 24.3 | 1.06 | 1.72  | 0.437 | 0.055 | <0.1  | 0.342 | 15   | 698  | 4    | 0.1  | 0.6  | 36.7 | 111  | 51   | 3    | <0.05 |
|          |      | TL               | 5.97  | 0.1  | 7.89 | 0.97 | 2.94 | 1.46 | 0.8   | 0.663 | 0.043 | <0.1  | 0.418 | 10   | 818  | 4    | 0.1  | 0.6  | 15.4 | 71   | 40.4 | 3.7  | <0.05 |
| S4-ESP   | Bulk | 6.32             | 0.3   | 10.9 | 1.22 | 5.53 | 1.73 | 1.08 | 0.862 | 0.06  | 0.15  | 0.511 | 28    | 1151 | 5    | 0.4  | 2.25 | 24.9 | 108  | 70.1 | 4.24 | 0.09 |       |
|          | Fe   | MC               | 1.78  | 0.1  | 6.52 | 1.56 | 29.8 | 0.8  | 1.82  | 0.333 | 0.067 | <0.1  | 0.289 | 27   | 652  | 5    | 0.2  | 1    | 49   | 212  | 59.3 | 2.4  | 0.06  |
|          |      | TL               | 7.1   | 0.3  | 9.11 | 0.82 | 3.28 | 1.83 | 0.95  | 0.799 | 0.055 | <0.1  | 0.503 | 24   | 1156 | 5    | 0.4  | 1.9  | 23.3 | 103  | 66.3 | 4.3  | 0.07  |

BA - bottom ash; ECO, economizer grits; ESP, electrostatic precipitator; MC, magnetic concentrate; TL, tailings;

Table S1 – Continuation.

| Li   | Mn   | Mo  | Nb    | Ni    | Pb    | Re     | Rb    | Sb   | Se   | Sn  | Sr  | Ta  | Te   | Th   | Tl   | U    | V   | W   | Zn    | Zr    | Sc   |
|------|------|-----|-------|-------|-------|--------|-------|------|------|-----|-----|-----|------|------|------|------|-----|-----|-------|-------|------|
| 89.6 | 451  | 13  | 12.26 | 70    | 25.25 | 0.03   | 36.3  | 7.64 | 5    | 3   | 203 | 0.8 | 0.17 | 4.7  | 1.73 | 4.6  | 275 | 2.1 | 169.2 | 137.9 | 14.3 |
| 41.5 | 2315 | 15  | 7.9   | 111   | 13.2  | <0.005 | 37.9  | 9.1  | 6    | 3.3 | 201 | 0.5 | <0.5 | 7.5  | 0.7  | 7    | 419 | 4.1 | 164   | 89.4  | 25   |
| 64.4 | 1898 | 15  | 8.5   | 56.9  | 11.5  | 0.035  | 48.8  | 4.6  | 13   | 1.5 | 222 | 0.6 | <0.5 | 7.9  | 0.7  | 3.9  | 225 | 2.2 | 88    | 99.1  | 22   |
| 58.7 | 2534 | 11  | 8.4   | 94.6  | 11.1  | 0.014  | 57.5  | 5.1  | 7    | 1.7 | 222 | 0.6 | <0.5 | 10   | 0.5  | 5.4  | 290 | 2   | 98    | 102.9 | 26   |
| 54.2 | 2202 | 13  | 9     | 109.7 | 13.3  | 0.009  | 36.9  | 8    | 7    | 2.6 | 228 | 0.6 | <0.5 | 8.9  | 0.6  | 7.2  | 376 | 3.4 | 149   | 95.8  | 26   |
| 60.1 | 2236 | 26  | 10.7  | 138   | 25.1  | 0.015  | 64.7  | 18.7 | 10   | 6.5 | 278 | 0.7 | <0.5 | 12.2 | 1.3  | 13.3 | 664 | 8.5 | 301   | 112.3 | 33   |
| 88.6 | 338  | 5.8 | 13.9  | 73    | 27    | 0.015  | 95.1  | 7.5  | 7    | 3.7 | 239 | 0.9 | <0.5 | 9.9  | 1.9  | 5.2  | 249 | 1.7 | 171   | 158.7 | 19   |
| 77.1 | 601  | 6.8 | 12.4  | 76.2  | 25.4  | 0.021  | 93.7  | 9.8  | 9    | 4.1 | 267 | 0.9 | <0.5 | 12.3 | 1.7  | 6.4  | 314 | 2.3 | 184   | 139.5 | 22   |
| 75.5 | 524  | 7.5 | 11    | 61.2  | 22.2  | 0.031  | 84.6  | 8    | 8    | 2.8 | 242 | 0.7 | <0.5 | 10.2 | 1.4  | 5.8  | 237 | 1.9 | 154   | 120.1 | 20   |
| 81.8 | 520  | 6.6 | 12    | 64.5  | 22.2  | 0.034  | 92.1  | 7.6  | 7    | 3   | 262 | 0.8 | <0.5 | 11.9 | 1.4  | 6    | 260 | 2.2 | 146   | 132.9 | 20   |
| 80.4 | 579  | 6.8 | 12.1  | 71.4  | 22    | 0.026  | 86.3  | 8.8  | 11   | 3.3 | 278 | 0.8 | <0.5 | 11.9 | 1.4  | 6.4  | 311 | 2.4 | 156   | 138   | 22   |
| 93   | 738  | 7.5 | 15.4  | 93.5  | 32.5  | 0.012  | 97.2  | 13   | 10   | 5.2 | 308 | 1   | <0.5 | 12.7 | 1.9  | 8.3  | 404 | 2.7 | 237   | 158.5 | 26   |
| 82.1 | 295  | 4.3 | 14.3  | 68.7  | 29.1  | 0.022  | 112.9 | 8    | 8    | 3.5 | 261 | 1   | <0.5 | 11.7 | 2    | 5.4  | 237 | 1.5 | 180   | 161   | 19   |
| 84.1 | 566  | 4.7 | 12.91 | 69.9  | 11.43 | <0.002 | 35.2  | 3.47 | <0.3 | 1.1 | 249 | 0.9 | 0.06 | 6.1  | 0.59 | 4.1  | 214 | 1   | 99.5  | 169.8 | 16.3 |
| 73.9 | 1111 | 5.8 | 11.1  | 77.2  | 10.6  | <0.005 | 66.9  | 3.6  | <1   | 1.2 | 267 | 0.7 | <0.5 | 9.6  | 0.5  | 4.3  | 223 | 1.3 | 91    | 130.5 | 21   |
| 81.4 | 497  | 3   | 12.7  | 62.8  | 10.5  | <0.005 | 78.4  | 3.2  | <1   | 1   | 276 | 0.9 | <0.5 | 10.3 | 0.5  | 4.2  | 210 | 1   | 84    | 167.8 | 20   |
| 83.6 | 626  | 11  | 11.29 | 61.1  | 11.43 | 0.015  | 43.2  | 3.89 | 1.1  | 1.2 | 262 | 0.8 | 0.07 | 7.5  | 0.81 | 3.9  | 201 | 1.3 | 74.3  | 138.4 | 17.2 |
| 56.6 | 2052 | 11  | 9.4   | 108   | 9     | <0.005 | 60.1  | 4.6  | <1   | 1.3 | 260 | 0.6 | <0.5 | 8.6  | 0.6  | 4.7  | 251 | 1.9 | 90    | 114.4 | 24   |
| 79   | 297  | 4.6 | 11.3  | 50.3  | 10.6  | 0.01   | 78.7  | 3.3  | <1   | 0.9 | 259 | 0.8 | <0.5 | 9.6  | 0.8  | 3.8  | 174 | 1.1 | 71    | 138   | 18   |
| 96.5 | 538  | 21  | 13.18 | 84.4  | 26.23 | 0.048  | 53.7  | 10.1 | 18.9 | 3   | 323 | 0.9 | 0.15 | 7.8  | 2.02 | 5.7  | 283 | 2.6 | 159.4 | 158.5 | 20.9 |
| 45.3 | 2122 | 16  | 8.5   | 134.6 | 11.8  | <0.005 | 43.4  | 8.7  | 9    | 2.7 | 224 | 0.5 | <0.5 | 7.6  | 0.8  | 7.3  | 408 | 3.2 | 154   | 97.4  | 25   |
| 91.3 | 340  | 8.2 | 14.1  | 78.7  | 26.1  | 0.022  | 97.7  | 9.1  | 13   | 2.6 | 329 | 0.9 | <0.5 | 11.2 | 2.1  | 5.7  | 253 | 1.8 | 170   | 164.4 | 23   |

Table S2- Pearson's correlation coefficients for bulk Fe-MC.

|                  | Al          | Ca           | Fe          | K            | Mg           | Na           | P            | Ti           | As           | Ba           | Be           | Bi          | Cd           | Co           | Cr          | Cu           | Hf           | Li           | Mn           | Mo           | Nb           | Ni           | Pb          | Rb          | Sb           | Sn           | Sr          | Ta    | Th           | U            | V           | W           | Zn          | Zr    | Sc           |      |
|------------------|-------------|--------------|-------------|--------------|--------------|--------------|--------------|--------------|--------------|--------------|--------------|-------------|--------------|--------------|-------------|--------------|--------------|--------------|--------------|--------------|--------------|--------------|-------------|-------------|--------------|--------------|-------------|-------|--------------|--------------|-------------|-------------|-------------|-------|--------------|------|
| C <sub>tot</sub> | 1.00        |              |             |              |              |              |              |              |              |              |              |             |              |              |             |              |              |              |              |              |              |              |             |             |              |              |             |       |              |              |             |             |             |       |              |      |
| Al               | -0.50       | 1.00         |             |              |              |              |              |              |              |              |              |             |              |              |             |              |              |              |              |              |              |              |             |             |              |              |             |       |              |              |             |             |             |       |              |      |
| Ca               | 0.32        | -0.80        | 1.00        |              |              |              |              |              |              |              |              |             |              |              |             |              |              |              |              |              |              |              |             |             |              |              |             |       |              |              |             |             |             |       |              |      |
| Fe               | 0.75        | <b>-0.94</b> | 0.67        | 1.00         |              |              |              |              |              |              |              |             |              |              |             |              |              |              |              |              |              |              |             |             |              |              |             |       |              |              |             |             |             |       |              |      |
| K                | -0.65       | <b>0.97</b>  | -0.68       | <b>-0.99</b> | 1.00         |              |              |              |              |              |              |             |              |              |             |              |              |              |              |              |              |              |             |             |              |              |             |       |              |              |             |             |             |       |              |      |
| Mg               | 0.23        | <b>-0.88</b> | <b>0.88</b> | 0.70         | -0.74        | 1.00         |              |              |              |              |              |             |              |              |             |              |              |              |              |              |              |              |             |             |              |              |             |       |              |              |             |             |             |       |              |      |
| Na               | -0.72       | <b>0.93</b>  | -0.58       | <b>-0.98</b> | <b>0.98</b>  | -0.69        | 1.00         |              |              |              |              |             |              |              |             |              |              |              |              |              |              |              |             |             |              |              |             |       |              |              |             |             |             |       |              |      |
| P                | 0.30        | -0.72        | 0.39        | 0.63         | -0.66        | 0.76         | -0.73        | 1.00         |              |              |              |             |              |              |             |              |              |              |              |              |              |              |             |             |              |              |             |       |              |              |             |             |             |       |              |      |
| Ti               | -0.61       | <b>0.98</b>  | -0.70       | <b>-0.98</b> | <b>0.99</b>  | -0.80        | <b>0.98</b>  | -0.75        | 1.00         |              |              |             |              |              |             |              |              |              |              |              |              |              |             |             |              |              |             |       |              |              |             |             |             |       |              |      |
| As               | 0.73        | -0.79        | 0.31        | <b>0.90</b>  | <b>-0.90</b> | 0.47         | <b>-0.95</b> | 0.68         | <b>-0.88</b> | 1.00         |              |             |              |              |             |              |              |              |              |              |              |              |             |             |              |              |             |       |              |              |             |             |             |       |              |      |
| Ba               | -0.49       | <b>0.90</b>  | -0.67       | <b>-0.83</b> | <b>0.84</b>  | <b>-0.89</b> | <b>0.87</b>  | <b>-0.93</b> | <b>0.90</b>  | -0.75        | 1.00         |             |              |              |             |              |              |              |              |              |              |              |             |             |              |              |             |       |              |              |             |             |             |       |              |      |
| Be               | 0.58        | -0.32        | -0.16       | 0.53         | -0.53        | -0.15        | -0.58        | 0.11         | -0.45        | 0.75         | -0.14        | 1.00        |              |              |             |              |              |              |              |              |              |              |             |             |              |              |             |       |              |              |             |             |             |       |              |      |
| Bi               | 0.44        | -0.62        | 0.03        | 0.67         | -0.71        | 0.36         | -0.79        | 0.77         | -0.72        | <b>0.90</b>  | -0.68        | 0.69        | 1.00         |              |             |              |              |              |              |              |              |              |             |             |              |              |             |       |              |              |             |             |             |       |              |      |
| Cd               | 0.66        | -0.77        | 0.27        | <b>0.86</b>  | <b>-0.87</b> | 0.48         | <b>-0.94</b> | 0.74         | <b>-0.86</b> | <b>0.99</b>  | -0.76        | 0.74        | <b>0.94</b>  | 1.00         |             |              |              |              |              |              |              |              |             |             |              |              |             |       |              |              |             |             |             |       |              |      |
| Co               | 0.80        | -0.63        | 0.14        | <b>0.82</b>  | -0.79        | 0.23         | <b>-0.86</b> | 0.48         | -0.75        | <b>0.96</b>  | -0.56        | <b>0.88</b> | <b>0.83</b>  | <b>0.93</b>  | 1.00        |              |              |              |              |              |              |              |             |             |              |              |             |       |              |              |             |             |             |       |              |      |
| Cr               | 0.47        | -0.71        | 0.18        | 0.73         | -0.77        | 0.51         | <b>-0.85</b> | <b>0.86</b>  | -0.79        | <b>0.91</b>  | -0.79        | 0.59        | <b>0.98</b>  | <b>0.96</b>  | 0.80        | 1.00         |              |              |              |              |              |              |             |             |              |              |             |       |              |              |             |             |             |       |              |      |
| Cu               | 0.36        | -0.67        | 0.14        | 0.68         | -0.70        | 0.50         | -0.76        | <b>0.86</b>  | -0.75        | <b>0.84</b>  | -0.78        | 0.46        | <b>0.94</b>  | <b>0.86</b>  | 0.72        | <b>0.93</b>  | 1.00         |              |              |              |              |              |             |             |              |              |             |       |              |              |             |             |             |       |              |      |
| Hf               | -0.51       | <b>0.97</b>  | -0.65       | <b>-0.93</b> | <b>0.97</b>  | <b>-0.82</b> | <b>0.95</b>  | -0.81        | <b>0.99</b>  | <b>-0.87</b> | <b>0.92</b>  | -0.42       | -0.77        | <b>-0.87</b> | -0.72       | <b>-0.84</b> | <b>-0.81</b> | 1.00         |              |              |              |              |             |             |              |              |             |       |              |              |             |             |             |       |              |      |
| Li               | -0.52       | <b>0.98</b>  | -0.77       | <b>-0.93</b> | <b>0.94</b>  | <b>-0.90</b> | <b>0.92</b>  | -0.81        | <b>0.98</b>  | -0.79        | <b>0.96</b>  | -0.26       | -0.65        | -0.78        | -0.62       | -0.75        | -0.73        | <b>0.98</b>  | 1.00         |              |              |              |             |             |              |              |             |       |              |              |             |             |             |       |              |      |
| Mn               | 0.53        | <b>-0.96</b> | <b>0.92</b> | <b>0.90</b>  | <b>-0.90</b> | <b>0.92</b>  | <b>-0.85</b> | 0.64         | <b>-0.92</b> | 0.65         | <b>-0.87</b> | 0.14        | 0.41         | 0.62         | 0.49        | 0.54         | 0.49         | <b>-0.89</b> | <b>-0.95</b> | 1.00         |              |              |             |             |              |              |             |       |              |              |             |             |             |       |              |      |
| Mo               | 0.74        | <b>-0.82</b> | 0.36        | <b>0.92</b>  | <b>-0.91</b> | 0.51         | <b>-0.97</b> | 0.70         | <b>-0.90</b> | <b>1.00</b>  | -0.78        | 0.73        | <b>0.89</b>  | <b>0.99</b>  | <b>0.95</b> | <b>0.91</b>  | <b>0.82</b>  | <b>-0.89</b> | <b>-0.82</b> | 0.69         | 1.00         |              |             |             |              |              |             |       |              |              |             |             |             |       |              |      |
| Nb               | -0.46       | <b>0.97</b>  | -0.81       | <b>-0.89</b> | <b>0.91</b>  | <b>-0.94</b> | <b>0.88</b>  | -0.81        | <b>0.95</b>  | -0.72        | <b>0.96</b>  | -0.15       | -0.58        | -0.71        | -0.53       | -0.70        | -0.69        | <b>0.95</b>  | <b>0.99</b>  | <b>-0.96</b> | -0.75        | 1.00         |             |             |              |              |             |       |              |              |             |             |             |       |              |      |
| Ni               | <b>0.81</b> | -0.67        | 0.21        | <b>0.85</b>  | <b>-0.82</b> | 0.26         | <b>-0.87</b> | 0.45         | -0.78        | <b>0.96</b>  | -0.56        | <b>0.87</b> | 0.80         | <b>0.91</b>  | <b>1.00</b> | 0.77         | 0.69         | -0.74        | -0.64        | 0.54         | <b>0.94</b>  | -0.56        | 1.00        |             |              |              |             |       |              |              |             |             |             |       |              |      |
| Pb               | 0.14        | -0.06        | -0.50       | 0.12         | -0.16        | -0.10        | -0.31        | 0.54         | -0.18        | 0.52         | -0.27        | 0.51        | 0.79         | 0.61         | 0.51        | 0.74         | 0.68         | -0.26        | -0.12        | -0.16        | 0.50         | -0.06        | 0.43        | 1.00        |              |              |             |       |              |              |             |             |             |       |              |      |
| Rb               | -0.51       | <b>0.93</b>  | -0.56       | <b>-0.89</b> | <b>0.94</b>  | -0.76        | <b>0.96</b>  | <b>-0.83</b> | <b>0.95</b>  | <b>-0.90</b> | <b>0.90</b>  | -0.50       | <b>-0.84</b> | <b>-0.92</b> | -0.75       | <b>-0.91</b> | <b>-0.81</b> | <b>0.97</b>  | <b>0.93</b>  | <b>-0.82</b> | <b>-0.92</b> | <b>0.89</b>  | -0.76       | -0.41       | 1.00         |              |             |       |              |              |             |             |             |       |              |      |
| Sb               | 0.55        | -0.75        | 0.22        | 0.80         | <b>-0.83</b> | 0.49         | <b>-0.90</b> | 0.81         | <b>-0.84</b> | <b>0.96</b>  | -0.78        | 0.68        | <b>0.98</b>  | <b>0.99</b>  | <b>0.87</b> | <b>0.99</b>  | <b>0.92</b>  | <b>-0.87</b> | -0.77        | 0.58         | <b>0.96</b>  | -0.71        | <b>0.85</b> | 0.68        | <b>-0.92</b> | 1.00         |             |       |              |              |             |             |             |       |              |      |
| Sn               | 0.42        | -0.60        | 0.05        | 0.63         | -0.66        | 0.43         | -0.76        | <b>0.86</b>  | -0.69        | <b>0.85</b>  | -0.74        | 0.55        | <b>0.98</b>  | <b>0.91</b>  | 0.76        | <b>0.99</b>  | <b>0.93</b>  | -0.75        | -0.66        | 0.42         | <b>0.85</b>  | -0.60        | 0.71        | <b>0.83</b> | <b>-0.84</b> | <b>0.96</b>  | 1.00        |       |              |              |             |             |             |       |              |      |
| Sr               | 0.05        | 0.62         | -0.42       | -0.44        | 0.48         | -0.77        | 0.48         | <b>-0.88</b> | 0.59         | -0.40        | 0.81         | 0.21        | -0.53        | -0.45        | -0.16       | -0.61        | -0.75        | 0.68         | 0.71         | -0.57        | -0.41        | 0.75         | -0.15       | -0.29       | 0.62         | -0.54        | -0.61       | 1.00  |              |              |             |             |             |       |              |      |
| Ta               | -0.49       | <b>1.00</b>  | -0.76       | <b>-0.93</b> | <b>0.96</b>  | <b>-0.88</b> | <b>0.93</b>  | -0.76        | <b>0.99</b>  | -0.80        | <b>0.92</b>  | -0.32       | -0.66        | -0.79        | -0.64       | -0.74        | -0.72        | <b>0.99</b>  | <b>0.99</b>  | <b>-0.95</b> | <b>-0.82</b> | <b>0.98</b>  | -0.67       | -0.10       | <b>0.94</b>  | -0.77        | -0.64       | 0.67  | 1.00         |              |             |             |             |       |              |      |
| Th               | -0.53       | <b>0.97</b>  | -0.66       | <b>-0.93</b> | <b>0.95</b>  | <b>-0.84</b> | <b>0.94</b>  | <b>-0.84</b> | <b>0.98</b>  | <b>-0.86</b> | <b>0.95</b>  | -0.35       | -0.75        | <b>-0.85</b> | -0.70       | <b>-0.83</b> | <b>-0.82</b> | <b>0.99</b>  | <b>0.99</b>  | <b>-0.90</b> | <b>-0.87</b> | <b>0.97</b>  | -0.72       | -0.25       | <b>0.95</b>  | <b>-0.85</b> | -0.75       | 0.73  | <b>0.98</b>  | 1.00         |             |             |             |       |              |      |
| U                | 0.55        | -0.64        | 0.05        | 0.73         | -0.75        | 0.33         | <b>-0.83</b> | 0.71         | -0.75        | <b>0.95</b>  | -0.66        | 0.77        | <b>0.99</b>  | <b>0.97</b>  | <b>0.91</b> | <b>0.96</b>  | <b>0.91</b>  | -0.78        | -0.66        | 0.44         | <b>0.93</b>  | -0.58        | <b>0.88</b> | 0.75        | <b>-0.84</b> | <b>0.98</b>  | <b>0.95</b> | -0.44 | -0.67        | -0.76        | 1.00        |             |             |       |              |      |
| V                | 0.51        | -0.67        | 0.11        | 0.73         | -0.76        | 0.42         | <b>-0.84</b> | 0.80         | -0.77        | <b>0.93</b>  | -0.74        | 0.67        | <b>0.99</b>  | <b>0.97</b>  | <b>0.86</b> | <b>0.99</b>  | <b>0.94</b>  | <b>-0.81</b> | -0.71        | 0.49         | <b>0.93</b>  | -0.64        | <b>0.82</b> | 0.75        | <b>-0.87</b> | <b>0.99</b>  | <b>0.98</b> | -0.55 | -0.71        | -0.80        | <b>0.99</b> | 1.00        |             |       |              |      |
| W                | 0.58        | -0.67        | 0.16        | 0.73         | -0.74        | 0.47         | <b>-0.85</b> | <b>0.85</b>  | -0.76        | <b>0.91</b>  | -0.78        | 0.60        | <b>0.95</b>  | <b>0.95</b>  | <b>0.82</b> | <b>0.98</b>  | <b>0.89</b>  | -0.79        | -0.71        | 0.52         | <b>0.92</b>  | -0.66        | 0.78        | 0.75        | <b>-0.88</b> | <b>0.97</b>  | <b>0.98</b> | -0.54 | -0.69        | -0.79        | <b>0.95</b> | <b>0.97</b> | 1.00        |       |              |      |
| Zn               | 0.42        | -0.55        | -0.04       | 0.61         | -0.64        | 0.32         | -0.74        | 0.78         | -0.66        | <b>0.86</b>  | -0.66        | 0.65        | <b>0.99</b>  | <b>0.92</b>  | 0.80        | <b>0.97</b>  | <b>0.93</b>  | -0.72        | -0.59        | 0.35         | <b>0.85</b>  | -0.53        | 0.75        | <b>0.85</b> | -0.80        | <b>0.96</b>  | <b>0.99</b> | -0.53 | -0.59        | -0.70        | <b>0.97</b> | <b>0.99</b> | <b>0.96</b> | 1.00  |              |      |
| Zr               | -0.48       | <b>0.96</b>  | -0.67       | <b>-0.89</b> | <b>0.92</b>  | <b>-0.88</b> | <b>0.92</b>  | <b>-0.88</b> | <b>0.97</b>  | <b>-0.82</b> | <b>0.97</b>  | -0.28       | -0.74        | <b>-0.83</b> | -0.64       | <b>-0.83</b> | -0.81        | <b>0.98</b>  | <b>0.99</b>  | <b>-0.90</b> | <b>-0.84</b> | <b>0.98</b>  | -0.65       | -0.27       | <b>0.96</b>  | <b>-0.84</b> | -0.76       | 0.77  | <b>0.98</b>  | <b>0.99</b>  | -0.73       | -0.79       | -0.80       | -0.70 | 1.00         |      |
| Sc               | 0.52        | <b>-0.98</b> | <b>0.88</b> | <b>0.92</b>  | <b>-0.93</b> | <b>0.90</b>  | <b>-0.88</b> | 0.65         | <b>-0.95</b> | 0.70         | <b>-0.88</b> | 0.20        | 0.48         | 0.67         | 0.54        | 0.59         | 0.56         | <b>-0.92</b> | <b>-0.97</b> | <b>0.99</b>  | 0.73         | <b>-0.97</b> | 0.59        | -0.11       | <b>-0.85</b> | 0.63         | 0.47        | -0.59 | <b>-0.97</b> | <b>-0.93</b> | 0.50        | 0.54        | 0.55        | 0.40  | <b>-0.92</b> | 1.00 |

Table S3 - Pearson's correlation coefficients for size-fractions of Fe-MC.

|      | Ctot         | Ag          | Al           | Ca           | Fe           | K            | Mg           | Na           | P           | Ti           | As          | Ba           | Be          | Cd          | Co          | Cr          | Cu          | Hf           | Li           | Mn           | Mo           | Nb          | Ni          | Pb          | Rb          | Sb          | Sn          | Sr          | Ta           | Th          | U           | V           | W           | Zn          | Zr           | Sc   |
|------|--------------|-------------|--------------|--------------|--------------|--------------|--------------|--------------|-------------|--------------|-------------|--------------|-------------|-------------|-------------|-------------|-------------|--------------|--------------|--------------|--------------|-------------|-------------|-------------|-------------|-------------|-------------|-------------|--------------|-------------|-------------|-------------|-------------|-------------|--------------|------|
| Ctot | 1.00         |             |              |              |              |              |              |              |             |              |             |              |             |             |             |             |             |              |              |              |              |             |             |             |             |             |             |             |              |             |             |             |             |             |              |      |
| Ag   | -0.16        | 1.00        |              |              |              |              |              |              |             |              |             |              |             |             |             |             |             |              |              |              |              |             |             |             |             |             |             |             |              |             |             |             |             |             |              |      |
| Al   | -0.28        | 0.33        | 1.00         |              |              |              |              |              |             |              |             |              |             |             |             |             |             |              |              |              |              |             |             |             |             |             |             |             |              |             |             |             |             |             |              |      |
| Ca   | 0.37         | -0.02       | <b>-0.81</b> | 1.00         |              |              |              |              |             |              |             |              |             |             |             |             |             |              |              |              |              |             |             |             |             |             |             |             |              |             |             |             |             |             |              |      |
| Fe   | 0.07         | 0.30        | <b>-0.68</b> | <b>0.72</b>  | 1.00         |              |              |              |             |              |             |              |             |             |             |             |             |              |              |              |              |             |             |             |             |             |             |             |              |             |             |             |             |             |              |      |
| K    | -0.14        | -0.05       | <b>0.86</b>  | <b>-0.83</b> | <b>-0.93</b> | 1.00         |              |              |             |              |             |              |             |             |             |             |             |              |              |              |              |             |             |             |             |             |             |             |              |             |             |             |             |             |              |      |
| Mg   | 0.02         | 0.31        | <b>-0.70</b> | <b>0.81</b>  | <b>0.97</b>  | <b>-0.94</b> | 1.00         |              |             |              |             |              |             |             |             |             |             |              |              |              |              |             |             |             |             |             |             |             |              |             |             |             |             |             |              |      |
| Na   | -0.02        | -0.15       | <b>0.75</b>  | <b>-0.66</b> | <b>-0.93</b> | <b>0.93</b>  | <b>-0.91</b> | 1.00         |             |              |             |              |             |             |             |             |             |              |              |              |              |             |             |             |             |             |             |             |              |             |             |             |             |             |              |      |
| P    | -0.15        | <b>0.86</b> | 0.10         | 0.19         | 0.45         | -0.21        | 0.44         | -0.30        | 1.00        |              |             |              |             |             |             |             |             |              |              |              |              |             |             |             |             |             |             |             |              |             |             |             |             |             |              |      |
| Ti   | -0.45        | 0.13        | <b>0.91</b>  | <b>-0.87</b> | <b>-0.82</b> | <b>0.93</b>  | <b>-0.81</b> | <b>0.80</b>  | -0.05       | 1.00         |             |              |             |             |             |             |             |              |              |              |              |             |             |             |             |             |             |             |              |             |             |             |             |             |              |      |
| As   | 0.07         | <b>0.75</b> | -0.13        | 0.31         | <b>0.66</b>  | -0.43        | <b>0.59</b>  | -0.50        | <b>0.91</b> | -0.33        | 1.00        |              |             |             |             |             |             |              |              |              |              |             |             |             |             |             |             |             |              |             |             |             |             |             |              |      |
| Ba   | -0.47        | 0.27        | <b>0.80</b>  | <b>-0.69</b> | <b>-0.71</b> | <b>0.83</b>  | <b>-0.67</b> | <b>0.70</b>  | 0.14        | <b>0.91</b>  | -0.18       | 1.00         |             |             |             |             |             |              |              |              |              |             |             |             |             |             |             |             |              |             |             |             |             |             |              |      |
| Be   | -0.03        | <b>0.76</b> | 0.38         | -0.08        | 0.04         | 0.20         | 0.04         | 0.06         | <b>0.84</b> | 0.26         | <b>0.67</b> | 0.44         | 1.00        |             |             |             |             |              |              |              |              |             |             |             |             |             |             |             |              |             |             |             |             |             |              |      |
| Cd   | 0.06         | <b>0.83</b> | -0.05        | 0.29         | 0.54         | -0.34        | 0.51         | -0.36        | <b>0.94</b> | -0.24        | <b>0.96</b> | -0.06        | <b>0.71</b> | 1.00        |             |             |             |              |              |              |              |             |             |             |             |             |             |             |              |             |             |             |             |             |              |      |
| Co   | -0.24        | <b>0.63</b> | -0.19        | 0.23         | <b>0.81</b>  | <b>-0.59</b> | <b>0.71</b>  | <b>-0.70</b> | <b>0.69</b> | -0.37        | <b>0.81</b> | -0.30        | 0.32        | <b>0.72</b> | 1.00        |             |             |              |              |              |              |             |             |             |             |             |             |             |              |             |             |             |             |             |              |      |
| Cr   | -0.13        | <b>0.83</b> | 0.00         | 0.16         | <b>0.64</b>  | -0.38        | <b>0.57</b>  | -0.50        | <b>0.90</b> | -0.21        | <b>0.95</b> | -0.08        | <b>0.68</b> | <b>0.90</b> | <b>0.89</b> | 1.00        |             |              |              |              |              |             |             |             |             |             |             |             |              |             |             |             |             |             |              |      |
| Cu   | -0.45        | <b>0.87</b> | 0.29         | -0.12        | 0.39         | -0.13        | 0.37         | -0.34        | <b>0.81</b> | 0.15         | <b>0.69</b> | 0.25         | <b>0.63</b> | <b>0.70</b> | <b>0.78</b> | <b>0.84</b> | 1.00        |              |              |              |              |             |             |             |             |             |             |             |              |             |             |             |             |             |              |      |
| Hf   | -0.50        | 0.06        | <b>0.80</b>  | <b>-0.79</b> | <b>-0.80</b> | <b>0.85</b>  | <b>-0.77</b> | <b>0.72</b>  | -0.12       | <b>0.94</b>  | -0.44       | <b>0.93</b>  | 0.18        | -0.32       | -0.41       | -0.29       | 0.13        | 1.00         |              |              |              |             |             |             |             |             |             |             |              |             |             |             |             |             |              |      |
| Li   | 0.01         | 0.00        | <b>0.86</b>  | <b>-0.80</b> | <b>-0.82</b> | <b>0.91</b>  | <b>-0.88</b> | <b>0.90</b>  | -0.15       | <b>0.80</b>  | -0.27       | <b>0.67</b>  | 0.19        | -0.19       | -0.43       | -0.24       | -0.12       | <b>0.68</b>  | 1.00         |              |              |             |             |             |             |             |             |             |              |             |             |             |             |             |              |      |
| Mn   | 0.22         | 0.09        | <b>-0.82</b> | <b>0.90</b>  | <b>0.92</b>  | <b>-0.96</b> | <b>0.96</b>  | <b>-0.87</b> | 0.26        | <b>-0.93</b> | 0.45        | <b>-0.80</b> | -0.09       | 0.36        | 0.53        | 0.38        | 0.09        | <b>-0.89</b> | <b>-0.89</b> | 1.00         |              |             |             |             |             |             |             |             |              |             |             |             |             |             |              |      |
| Mo   | 0.31         | <b>0.62</b> | -0.29        | 0.45         | <b>0.73</b>  | -0.55        | <b>0.65</b>  | <b>-0.60</b> | <b>0.78</b> | -0.53        | <b>0.95</b> | -0.38        | <b>0.58</b> | <b>0.88</b> | <b>0.76</b> | <b>0.87</b> | 0.54        | <b>-0.61</b> | -0.37        | <b>0.59</b>  | 1.00         |             |             |             |             |             |             |             |              |             |             |             |             |             |              |      |
| Nb   | -0.49        | 0.22        | <b>0.87</b>  | <b>-0.86</b> | <b>-0.70</b> | <b>0.85</b>  | <b>-0.73</b> | <b>0.67</b>  | 0.08        | <b>0.95</b>  | -0.18       | <b>0.94</b>  | 0.35        | -0.10       | -0.19       | -0.05       | 0.31        | <b>0.94</b>  | <b>0.75</b>  | <b>-0.89</b> | -0.38        | 1.00        |             |             |             |             |             |             |              |             |             |             |             |             |              |      |
| Ni   | -0.25        | <b>0.70</b> | -0.15        | 0.25         | <b>0.80</b>  | <b>-0.57</b> | <b>0.73</b>  | <b>-0.70</b> | <b>0.72</b> | -0.34        | <b>0.80</b> | -0.24        | 0.38        | <b>0.73</b> | <b>0.99</b> | <b>0.90</b> | <b>0.84</b> | -0.36        | -0.45        | 0.53         | <b>0.74</b>  | -0.16       | 1.00        |             |             |             |             |             |              |             |             |             |             |             |              |      |
| Pb   | -0.19        | <b>0.82</b> | 0.46         | -0.30        | 0.13         | 0.18         | 0.04         | 0.01         | <b>0.84</b> | 0.30         | <b>0.78</b> | 0.41         | <b>0.83</b> | <b>0.78</b> | <b>0.59</b> | <b>0.82</b> | <b>0.78</b> | 0.18         | 0.28         | -0.16        | <b>0.63</b>  | 0.45        | <b>0.60</b> | 1.00        |             |             |             |             |              |             |             |             |             |             |              |      |
| Rb   | -0.47        | 0.08        | <b>0.80</b>  | <b>-0.68</b> | <b>-0.75</b> | <b>0.85</b>  | <b>-0.70</b> | <b>0.72</b>  | -0.06       | <b>0.92</b>  | -0.39       | <b>0.94</b>  | 0.26        | -0.31       | -0.42       | -0.28       | 0.11        | <b>0.93</b>  | <b>0.64</b>  | <b>-0.80</b> | <b>-0.56</b> | <b>0.89</b> | -0.36       | 0.19        | 1.00        |             |             |             |              |             |             |             |             |             |              |      |
| Sb   | -0.07        | <b>0.82</b> | -0.03        | 0.20         | <b>0.60</b>  | -0.35        | 0.53         | -0.46        | <b>0.94</b> | -0.20        | <b>0.98</b> | -0.03        | <b>0.73</b> | <b>0.95</b> | <b>0.83</b> | <b>0.97</b> | <b>0.80</b> | -0.29        | -0.23        | 0.36         | <b>0.90</b>  | -0.03       | <b>0.83</b> | <b>0.85</b> | -0.25       | 1.00        |             |             |              |             |             |             |             |             |              |      |
| Sn   | -0.12        | <b>0.83</b> | 0.07         | 0.08         | 0.55         | -0.27        | 0.47         | -0.42        | <b>0.92</b> | -0.12        | <b>0.96</b> | 0.01         | <b>0.74</b> | <b>0.91</b> | <b>0.83</b> | <b>0.98</b> | <b>0.83</b> | -0.22        | -0.15        | 0.28         | <b>0.87</b>  | 0.04        | <b>0.84</b> | <b>0.89</b> | -0.20       | <b>0.98</b> | 1.00        |             |              |             |             |             |             |             |              |      |
| Sr   | -0.41        | <b>0.59</b> | <b>0.63</b>  | -0.43        | -0.26        | 0.49         | -0.27        | 0.28         | <b>0.59</b> | <b>0.65</b>  | 0.32        | <b>0.81</b>  | <b>0.70</b> | 0.40        | 0.18        | 0.38        | <b>0.65</b> | <b>0.66</b>  | 0.38         | -0.49        | 0.12         | <b>0.79</b> | 0.25        | <b>0.73</b> | <b>0.68</b> | 0.45        | 0.47        | 1.00        |              |             |             |             |             |             |              |      |
| Ta   | -0.42        | -0.02       | <b>0.76</b>  | <b>-0.83</b> | <b>-0.77</b> | <b>0.87</b>  | <b>-0.80</b> | <b>0.70</b>  | -0.08       | <b>0.91</b>  | -0.31       | <b>0.89</b>  | 0.20        | -0.25       | -0.36       | -0.25       | 0.08        | <b>0.90</b>  | <b>0.74</b>  | <b>-0.90</b> | -0.49        | <b>0.95</b> | -0.35       | 0.30        | <b>0.88</b> | -0.18       | -0.12       | <b>0.69</b> | 1.00         |             |             |             |             |             |              |      |
| Th   | <b>-0.68</b> | 0.47        | <b>0.65</b>  | -0.44        | -0.23        | 0.45         | -0.20        | 0.25         | 0.44        | <b>0.68</b>  | 0.14        | <b>0.80</b>  | 0.51        | 0.17        | 0.18        | 0.27        | <b>0.62</b> | <b>0.69</b>  | 0.30         | -0.42        | -0.09        | <b>0.77</b> | 0.24        | <b>0.56</b> | <b>0.79</b> | 0.29        | 0.34        | <b>0.88</b> | <b>0.68</b>  | 1.00        |             |             |             |             |              |      |
| U    | -0.20        | <b>0.78</b> | 0.01         | 0.12         | <b>0.60</b>  | -0.33        | 0.52         | -0.49        | <b>0.91</b> | -0.15        | <b>0.94</b> | 0.00         | <b>0.68</b> | <b>0.88</b> | <b>0.88</b> | <b>0.97</b> | <b>0.85</b> | -0.23        | -0.22        | 0.32         | <b>0.85</b>  | 0.04        | <b>0.88</b> | <b>0.86</b> | -0.20       | <b>0.98</b> | <b>0.98</b> | 0.49        | -0.11        | 0.38        | 1.00        |             |             |             |              |      |
| V    | -0.15        | <b>0.79</b> | -0.01        | 0.14         | <b>0.64</b>  | -0.37        | <b>0.55</b>  | -0.51        | <b>0.90</b> | -0.20        | <b>0.96</b> | -0.08        | <b>0.66</b> | <b>0.89</b> | <b>0.90</b> | <b>0.99</b> | <b>0.83</b> | -0.30        | -0.24        | 0.37         | <b>0.87</b>  | -0.03       | <b>0.89</b> | <b>0.84</b> | -0.28       | <b>0.98</b> | <b>0.99</b> | 0.40        | -0.19        | 0.29        | <b>0.99</b> | 1.00        |             |             |              |      |
| W    | -0.26        | <b>0.66</b> | 0.40         | -0.33        | 0.18         | 0.12         | 0.06         | -0.11        | <b>0.73</b> | 0.25         | <b>0.70</b> | 0.33         | <b>0.78</b> | <b>0.61</b> | <b>0.62</b> | <b>0.80</b> | <b>0.75</b> | 0.16         | 0.20         | -0.12        | <b>0.59</b>  | 0.43        | <b>0.61</b> | <b>0.92</b> | 0.18        | <b>0.77</b> | <b>0.85</b> | <b>0.64</b> | 0.27         | <b>0.55</b> | <b>0.83</b> | <b>0.81</b> | 1.00        |             |              |      |
| Zn   | -0.22        | <b>0.85</b> | 0.18         | -0.04        | 0.46         | -0.17        | 0.38         | -0.34        | <b>0.91</b> | 0.00         | <b>0.91</b> | 0.14         | <b>0.77</b> | <b>0.88</b> | <b>0.82</b> | <b>0.97</b> | <b>0.88</b> | -0.08        | -0.06        | 0.17         | <b>0.79</b>  | 0.18        | <b>0.83</b> | <b>0.93</b> | -0.08       | <b>0.96</b> | <b>0.99</b> | <b>0.56</b> | -0.01        | 0.44        | <b>0.98</b> | <b>0.97</b> | <b>0.89</b> | 1.00        |              |      |
| Zr   | -0.49        | 0.08        | <b>0.86</b>  | <b>-0.84</b> | <b>-0.79</b> | <b>0.89</b>  | <b>-0.77</b> | <b>0.73</b>  | -0.10       | <b>0.97</b>  | -0.39       | <b>0.92</b>  | 0.18        | -0.31       | -0.37       | -0.26       | 0.16        | <b>0.97</b>  | <b>0.73</b>  | <b>-0.90</b> | <b>-0.57</b> | <b>0.96</b> | -0.33       | 0.24        | <b>0.95</b> | -0.25       | -0.17       | <b>0.67</b> | <b>0.95</b>  | <b>0.73</b> | -0.18       | -0.24       | 0.21        | -0.04       | 1.00         |      |
| Sc   | -0.11        | <b>0.65</b> | -0.40        | <b>0.57</b>  | <b>0.89</b>  | <b>-0.75</b> | <b>0.91</b>  | <b>-0.80</b> | <b>0.72</b> | <b>-0.56</b> | <b>0.79</b> | -0.40        | 0.36        | <b>0.74</b> | <b>0.86</b> | <b>0.83</b> | <b>0.68</b> | <b>-0.57</b> | <b>-0.69</b> | <b>0.78</b>  | <b>0.79</b>  | -0.45       | <b>0.89</b> | 0.41        | -0.51       | <b>0.79</b> | <b>0.76</b> | 0.04        | <b>-0.61</b> | 0.07        | <b>0.78</b> | <b>0.81</b> | 0.40        | <b>0.70</b> | <b>-0.56</b> | 1.00 |
